# Supplementary material
Source: Springer Nature journal article supplement (https://www.springermedizin.de/resource/supplementary/12883_2011_506_MOESM9_ESM.pdf/9455290)
Supplement: MOESM9 [file 9455290]

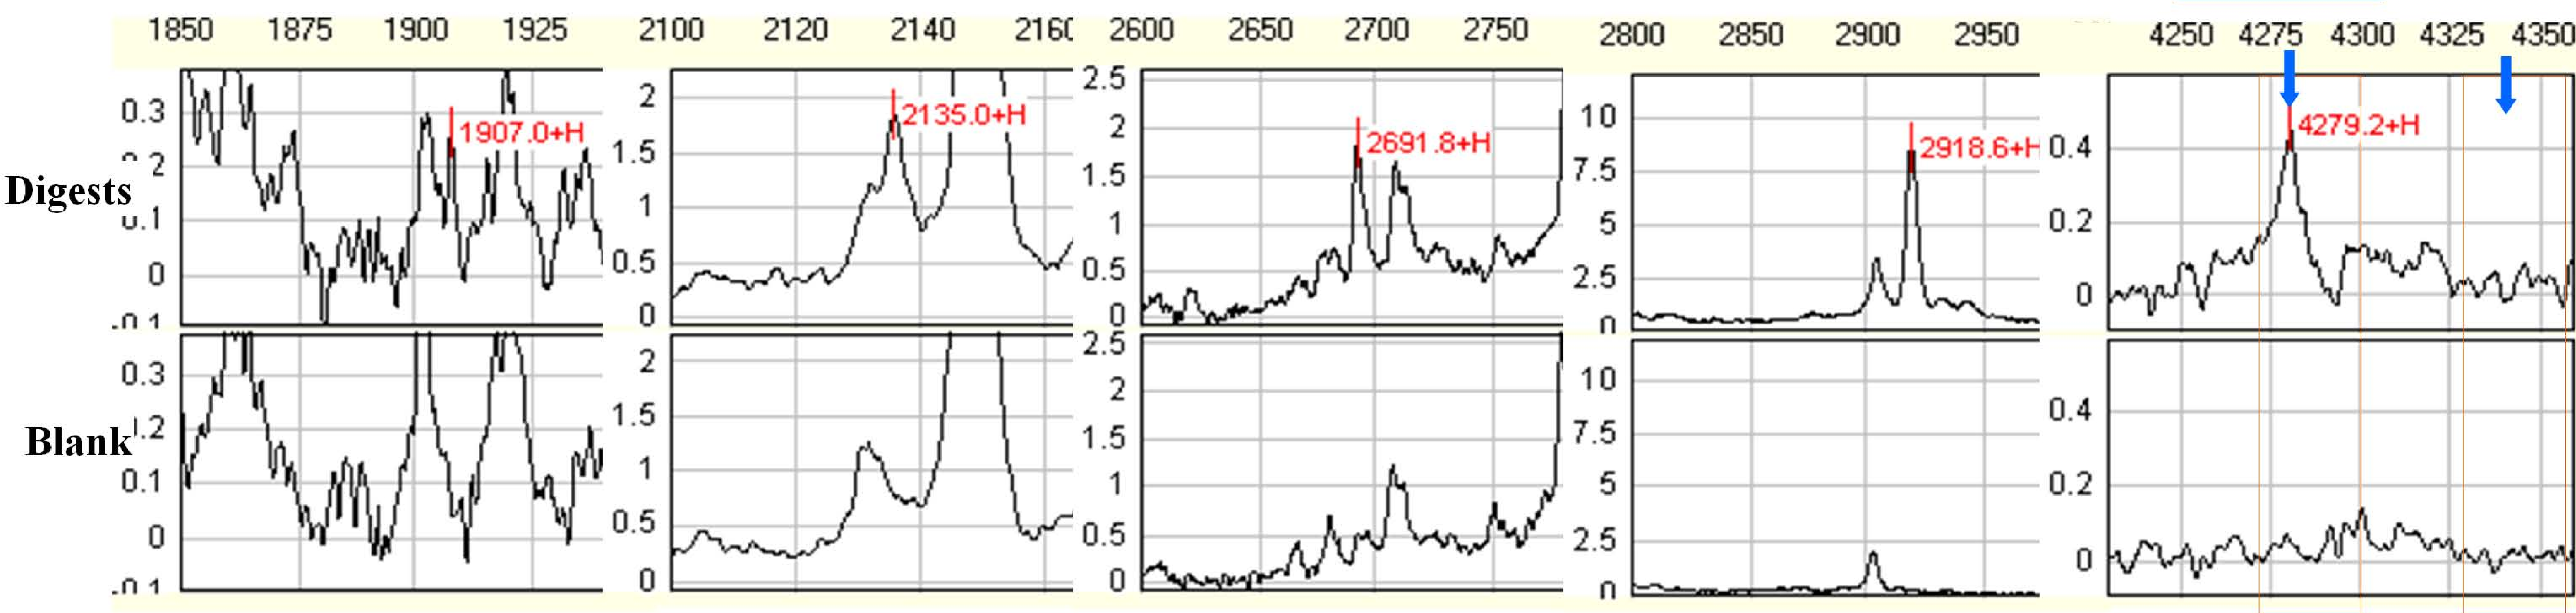

**Neuro-endocrine specific protein VGF [Homo sapiens]**  
 GEERVGEEDEEAAEAAEAEADEAERAR**QNALLFAEEEDGEAGAED**

**Neurosecretory protein VF precursor [Homo sapiens]**  
 GGEERVGEEDEEAAEAEAEAEEAERAR**QNALLFAEEEDGEAGAED**

| Mass    | Position | #MC | Peptide Sequence                                                      |
|---------|----------|-----|-----------------------------------------------------------------------|
| 4337.33 | 5-45     | 2   | VGEEDEEAAE <u>A</u> A <u>E</u> AE <u>A</u> DEAERARQNALLFAEEEDGEAGAE D |
| 2918.89 | 1-27     | 2   | GEERVGEEDEEAAE <u>A</u> A <u>E</u> AE <u>A</u> DEAERAR *1             |
| 2691.63 | 1-25     | 1   | GEERVGEEDEEAAE <u>A</u> A <u>E</u> AE <u>A</u> DEAER *2               |
| 2447.42 | 5-27     | 1   | VGEEDEEAAE <u>A</u> A <u>E</u> AE <u>A</u> DEAERAR                    |
| 2220.16 | 5-25     | 0   | VGEEDEEAAE <u>A</u> A <u>E</u> AE <u>A</u> DEAER                      |
| 2135.19 | 26-45    | 1   | ARQNALLFAEEEDGEAGAED                                                  |
| 1907.92 | 28-45    | 0   | QNALLFAEEEDGEAGAED                                                    |
| 489.49  | 1-4      | 0   | GEER                                                                  |
| 245.28  | 26-27    | 0   | AR                                                                    |

| Mass    | Position | #MC | Peptide Sequence                                           |
|---------|----------|-----|------------------------------------------------------------|
| 4280.27 | 6-45     | 2   | VGEEDEEAAE <u>A</u> EAE <u>A</u> EEAERARQNALLFAEEEDGEAGAED |
| 2918.89 | 1-27     | 2   | GGEERVGEEDEEAAE <u>A</u> EAE <u>A</u> EEAERAR *1           |
| 2691.63 | 1-25     | 1   | GGEERVGEEDEEAAE <u>A</u> EAE <u>A</u> EEAER *2             |
| 2390.37 | 6-27     | 1   | VGEEDEEAAE <u>A</u> EAE <u>A</u> EEAERAR                   |
| 2163.10 | 6-25     | 0   | VGEEDEEAAE <u>A</u> EAE <u>A</u> EEAER                     |
| 2135.19 | 26-45    | 1   | ARQNALLFAEEEDGEAGAED                                       |
| 1907.92 | 28-45    | 0   | QNALLFAEEEDGEAGAED                                         |
| 546.54  | 1-5      | 0   | GGEER                                                      |
| 245.28  | 26-27    | 0   | AR                                                         |

**Red characters: Peak area detected by PMF analysis**  
**Underline: different amino acid residues**  
**\*1, \*2 : same molecular weight, but different sequence**
